# Supplementary material for: Activation of the Cell Wall Integrity Pathway Promotes Escape from G2 in the Fungus Ustilago maydis
Source: PubMed Central journal article supplement (PMC2895642; doi:10.1371/journal.pgen.1001009), 2010-07-01
Supplement: pgen.1001009.s003.pdf [file pgen.1001009.s003.pdf]

$P_{crg1}:mkk1^{DD}$

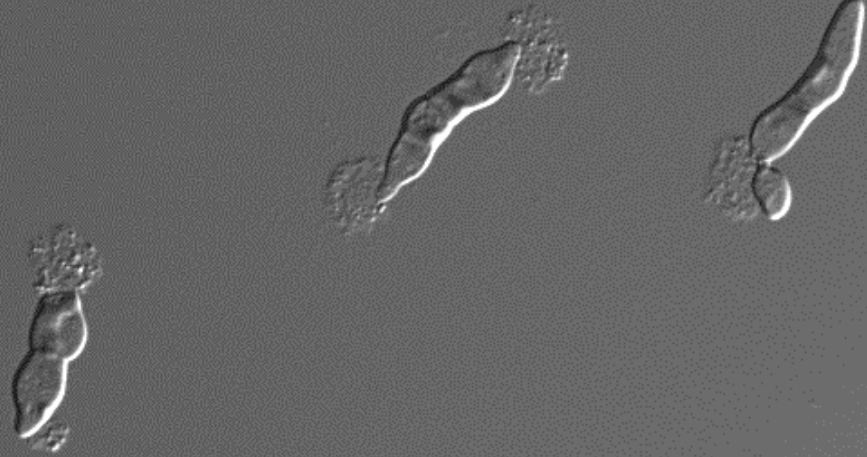

10  $\mu$ m
