# Supplementary material for: Activation of the Cell Wall Integrity Pathway Promotes Escape from G2 in the Fungus Ustilago maydis
Source: PubMed Central journal article supplement (PMC2895642; doi:10.1371/journal.pgen.1001009), 2010-07-01

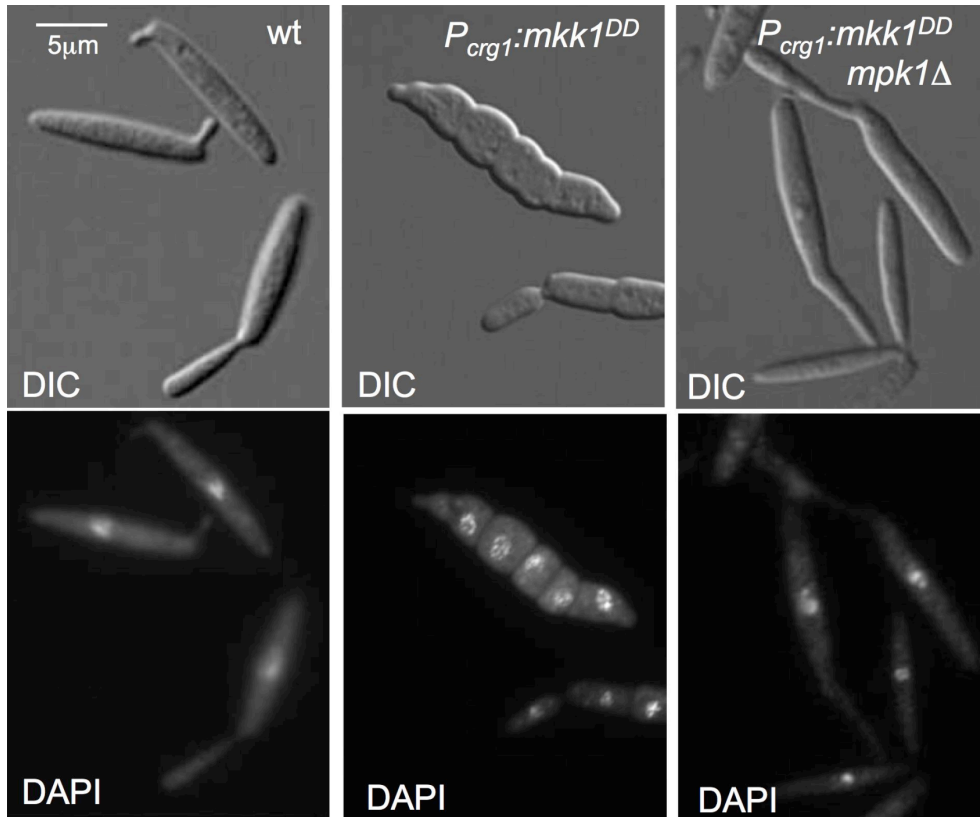

Supplement: pgen.1001009.s004.pdf [file pgen.1001009.s004.pdf]
